# Supplementary material
Source: Royal Society of Chemistry journal article supplement (doi:10.1039/d6ma00097e)
Supplement: d6ma00097e1.pdf [file d6ma00097e1.pdf]

† Electronic Supplementary Information (ESI)

## **Thermodynamic studies on entropy stabilized oxide (Co,Cu,Mg,Ni,Zn)O**

Florina Teodorescu<sup>a</sup>, Cornelia Marinescu<sup>a</sup>, Ancuta Sofronia<sup>a</sup>, Alina Botea-Petcu<sup>a</sup>, Cristian Hornoiu<sup>a</sup>, Mihail-Călin Licu<sup>a</sup>, Florentina Maxim<sup>a</sup>, David Berardan<sup>b</sup>, Nita Drago<sup>b\*</sup> and Speranta Tanasescu<sup>a\*</sup>

<sup>a</sup>Department of Chemical Thermodynamics, Institute of Physical Chemistry - Ilie Murgulescu of the Romanian Academy, Bucharest, Romania

<sup>b</sup>ICMMO (UMR 8182 CNRS), Université Paris-Saclay, 91405 Orsay, France

*\*<sup>a</sup>E-mail: speranta.tanasescu@gmail.com; stanasescu2004@yahoo.com; stanasescu@icf.ro;*

*\*<sup>b</sup>E-mail: nita.dragoe@universite-paris-saclay.fr*

Final Le Bail Fit  
 $a = 4.2381(3) \text{ \AA}$ ,  $2\theta\text{-offset} = 0.008(3)^\circ$ ,  $R_{wp} = 6.73\%$

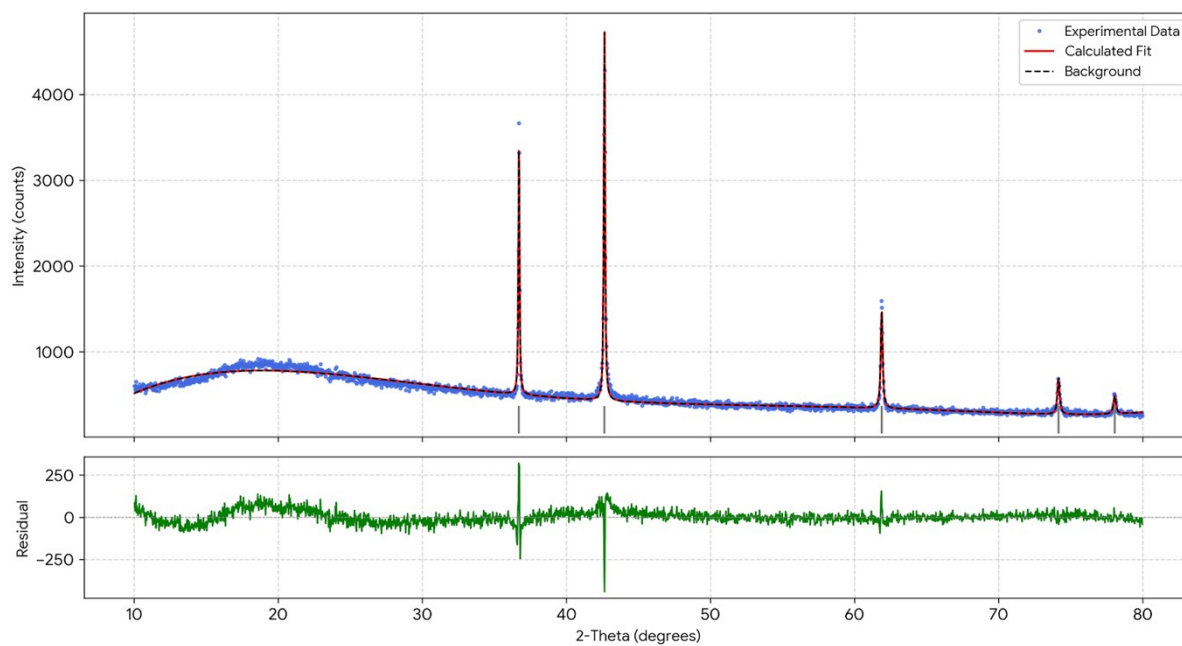

**Figure S1:** Powder XRD and Le Bail fit for the analyzed samples. (24 bars of the same starting materials were used in this study).

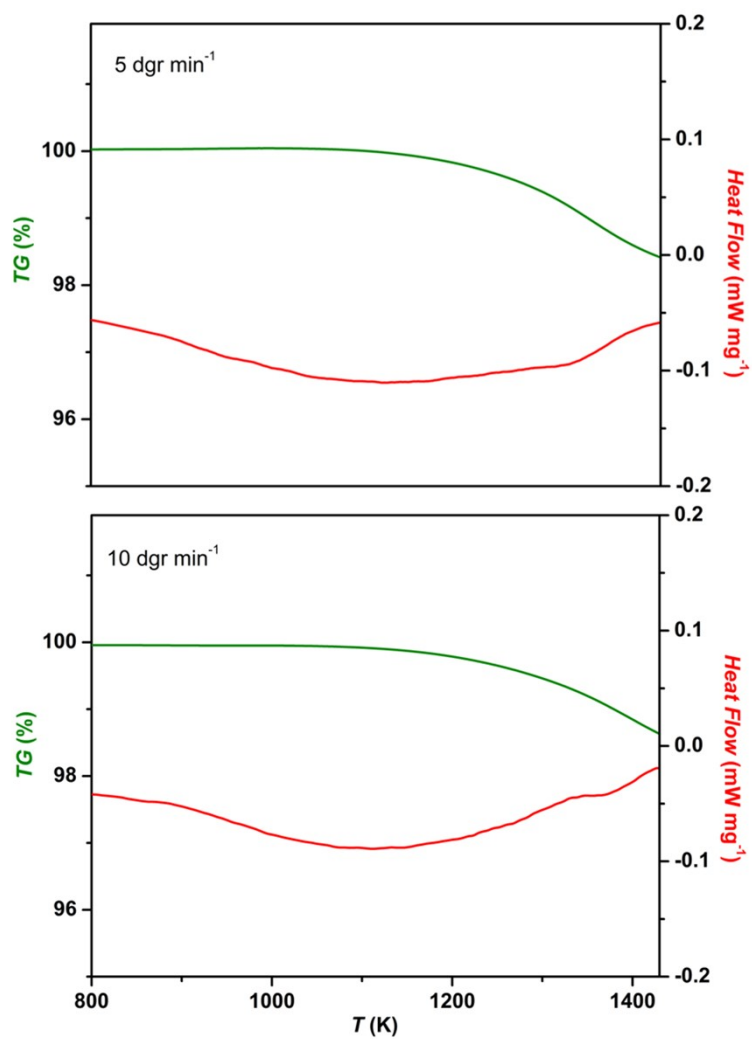

**Figure S2:** TG and DSC plots of the as-prepared (Co,Cu,Mg,Ni,Zn)O sample recorded at 5 K min<sup>-1</sup> (upper panel) and 10 K min<sup>-1</sup> (lower panel).
